# Supplementary material for: Acquired Obesity Is Associated with Changes in the Serum Lipidomic Profile Independent of Genetic Effects – A Monozygotic Twin Study
Source: PLoS One. 2007 Feb 14;2(2):e218. doi: 10.1371/journal.pone.0000218 (PMC1789242; doi:10.1371/journal.pone.0000218)
Supplement: Dataset S1 — Lipidomics dataset and clinical variables (0.16 MB XLS) [file pone.0000218.s001.xls]

## Sheet: Data
Label	bH46m	bL45m	cH49m	cL50m	dH20m	dL21m	eH39f	eL40f	gH26f	gL29f	hH19f	hL8f	kHJ16m	kL11m	mH43f	mL41f	rH3m	rL9m	sH47m	sL48m	uH27m	uL22m	vH23f	vL15f	wH7f	wL6f	yH13m	yL4m	aH32m	aL34m	fH30m	fL33m	iH1m	iL5m	jH38m	jL37m	lH17f	lL25f	oH12f	oL14f	pH2f	pL10f	qH42f	qL44f	tH35m	tL36m	xH18f	xL24f
Male(1)/Female(2)	1	1	1	1	1	1	2	2	2	2	2	2	1	1	2	2	1	1	1	1	1	1	2	2	2	2	1	1	1	1	1	1	1	1	1	1	2	2	2	2	2	2	2	2	1	1	2	2
Disc(1)/Conc(2)	1	1	1	1	1	1	1	1	1	1	1	1	1	1	1	1	1	1	1	1	1	1	1	1	1	1	1	1	2	2	2	2	2	2	2	2	2	2	2	2	2	2	2	2	2	2	2	2
High(1)/Low(2) BMI diff.	1	2	1	2	1	2	1	2	1	2	1	2	1	2	1	2	1	2	1	2	1	2	1	2	1	2	1	2	1	2	1	2	1	2	1	2	1	2	1	2	1	2	1	2	1	2	1	2
BMI	28.1	24.8	28.1	22.8	32.4763	27.3484	28.23	24.54	30.6308	25.5105	30.1543	25.6349	31.5106	26.047	31.9	26.1	28.4485	23.3673	29.7	26.1	29.1541	25.3641	32.9142	22.7646	33.8573	29.8938	32.5332	25.0865	29.2335	26.9221	21.6084	19.9868	21.412	21.028	23.6841	23.6742	26.8155	25.4603	20.7729	20.0982	30.4123	29.3535	45.77	44.47	29.698	28.7619	24.0793	23.7109
FatP	27.2	18.9	34.6	16.5	36.3897	23.3294	47.2	43	42.8565	38.4905	45.6041	38.4524	31.5299	24.6458	42.971	35.9462	34.4337	25.9264	32.6	28.7	32.2845	25.3367	40.5262	28.2101	50.2794	42.8022	38.03	21.3931	26.9033	22.2601	18.8862	13.904	6.40548	8.22581	20.3184	16.9182	36.3804	33.1464	20.724	19.1954	44.4145	45.7998	50.2	48.6	31.2093	29.932	37.3328	33.6275
SCFat	3156.61	1873.15	4518.13	2208.49	4375.65	2430.22	5391.22	3965.55	6009.81	4375.61	5113.3	3512.07	4476.26	2610.23	5821.06	3985.1	4578.44	2405.61	3551.92	3055.88	3920.3	2728.1	5967.24	2667.17	7468.87	5736.19	5439.93	1965.13	3445.98	2437.82	1600.28	1233.91	494.008	519.364	1339.92	1449.82	4197	3675.09	1596.44	1439.25	5917.03	5756.72	11502.8	9532.34	4126.63	3779.65	2385.76	2869.18
IAFat	1027.82	733.122	619.884	307.698	883.777	685.249	491.131	373.329	992.529	380.098	827.12	586.536	1547.6	688.586	987.699	550.449	655.019	470.673	1044.93	489.8	1065.42	537.75	1199.24	195.618	1183.45	922.525	1323.88	516.228	1499.93	1411.68	618.781	502.424	445.924	613.56	327.053	340.134	289.216	291.397	457.935	361.009	625.892	654.068	2989.87	2325.99	1251.21	865.791	670.799	423.484
Mvalue		2.21493	7.0253	15.2038	4.89159	11.9887	8.98674	8.01754	4.48244	8.44538	4.54585	7.62558	5.87998	8.80534	8.06733	10.3871	7.26881	6.55434	2.31441	5.36937	5.11849	4.20037	6.85256	9.55351	9.88415	9.7547	6.57421	13.0952	8.00093	9.73778	8.20229	8.75747	14.9216	11.5537	5.28166	4.4507	8.04191	7.67444	8.59178	9.8237	5.68436	7.23007	2.92169	2.18872	6.669	6.17521	7.22614	6.2294
Insulin	7.2	2.8	4.8	3.2	6	3	1.2	7.6	15	8	10	5	9	3	1.2	0.8	12	10	12.8	8.8	9	4	11	5	7	9	10	6	10	9	6	6	3	6	4	4	5	5	3	5	10	7	25.1	16.6	10	9	7	6
LDL	1.74	1.35	2.64	2.51	2.04	1.92	1.6	1.48	3.12	3.11	2.35	2.42	3.2	2.53	2.4	2.14	3.01	2.25	3.62	2.97	2.52	3.54	2.35	2.28	4.83	4.8	3.59	2.95	2.83	2.58	4.54	3.9	2.63	2.33	2.92	2.77	2.33	1.9	1.33	1.35	3.06	3.02	4.28		2.13	2.72	2.28	1.52
Cholesterol	3.2	3	4.6	4.9	3.6	3.6	4.4	4.6	4.7	4.8	4.7	4.3	4.8	4.2	4.8	4.1	5.1	3.9	5.8	5	4.3	5.3	4	5	7	7	5.1	4.5	4.8	4.5	6.2	5.3	4.6	3.8	5.1	4.5	4.3	3.6	3.5	3.9	4.4	4.6	6.2	6.1	4.9	5.5	4.2	4.1
HDL	1.04	1.31	1.54	2.05	0.91	1.14	2.56	2.83	1.24	1.28	1.3	1.34	0.96	1.24	1.79	1.67	1.37	1.15	1.42	1.55	1.16	1.28	1.35	1.93	1.42	1.51	1.03	1.21	0.98	1.08	1.19	1.1	1.09	1.03	1.67	1.28	1.77	1.46	1.95	2.16	1.03	1.19	1.23	1.11	1.79	2.04	1.56	1.96
Triglyceride	0.93	0.74	0.92	0.74	1.43	1.18	0.52	0.64	0.73	0.91	2.32	1.2	1.41	0.94	1.34	0.64	1.6	1.11	1.68	1.06	1.36	1.05	0.67	1.74	1.65	1.51	1.05	0.75	2.17	1.8	1.03	0.71	1.82	0.97	1.06	0.99	0.44	0.52	0.5	0.86	0.69	0.82	1.51	5.32	2.1	1.63	0.8	1.33
CRP					2.41	1	3.42	3.13	3.19	1.6	9.36	0.78	1.97	0.97	0.9	0.85	1.09	0.2			0.94	0.18	1.11	0.74	3.39	1.07	0.44	0.23	0.47	2.04	0.12	0.05	0.17	0.13	0.17	0.53		0.41	0.18	0.14	5.98	4.24	4.03	1.44	1.43	0.49	7.69
Leptin					23.48	7.153	39.12	25.279	19.582	16.85	37.409	31.987	18.45	6.469	43.593	18.783	17.377	8.576			8.681	5.487	28.923	12.172	49.61	25.461	24.119	15.085	7.243	6.325	5.286	3.624	2.28	1.647	4.222	3.641	19.325	11.109	5.588	6.08	35.997	39.419	48.534	56.145	15.989	11.079	10.706	18.214
Adiponectin					7557	9015	24842	30121	7144	7630	12350	14000	6766	10660	14650	20180	10750	14750			6504	7360	4913	14930	12290	12710	12630	11030	5101	6930	10900	10490	5656	4894	13535	9245	8413	7370	11920	11060	14560	17390	6536	7279	9147	8789	10340	12520
GPCho(16:0/0:0)	40.4659	45.8878	71.5776	56.7823	49.3635	43.7756	29.8697	58.9455	75.7774	64.8757	99.3771	37.4853	71.2768	15.3498	44.6279	62.9981	53.3469	49.3983	100.81	80.2184	67.0826	68.1864	77.0806	66.6632	39.1741	41.4871	67.8606	58.1966	65.1478	35.6891	66.6985	73.0629	54.6902	74.98	57.3714	58.2598	78.8969	43.7967	60.0586	80.6734	42.2249	34.0335	49.3963	82.9011	43.2726	68.5605	53.192	43.7393
GPCho(0:016:0)	2.8328	3.24974	5.38548	3.6071	3.60423	3.1209	2.31703	3.99685	5.08626	4.43057	7.16092	3.35095	4.77822	7.67492	3.24991	5.59355	4.93616	3.28316	9.78697	5.90184	4.81921	4.86786	5.17126	4.71	3.60687	2.89244	4.86592	3.94195	4.85451	2.6864	5.88046	5.42106	3.86607	5.01221	5.64984	4.26756	6.08989	3.27725	4.6236	5.47108	3.45058	2.57022	2.99274	6.10242	3.38918	4.92785	4.29266	4.01329
GPCho(16:1/0:0)	1.33398	1.76929	1.47322	1.26052	1.55633	1.37473	1.07664	1.18877	2.48045	0.814774	2.33436	0.982409	1.16101	7.67492	1.28931	1.4519	1.14407	1.22058	2.29569	1.84486	1.85243	1.13739	1.26368	2.0166	0.978774	0.781827	0.951039	1.67781	1.387	0.813635	1.50462	1.13098	1.17302	1.03021	1.38112	1.17582	1.50337	1.23227	1.13672	2.09854	1.04523	0.719087	0.646377	1.4105	0.819036	1.38958	0.943123	0.856213
GPCho(18:0/0:0)	17.0864	11.9942	23.9529	18.4173	16.892	16.7221	12.1753	17.8255	19.3625	27.8613	29.9858	13.2481	23.7403	15.3498	22.0929	31.8346	31.5156	16.0611	41.2013	29.6184	30.6783	27.721	33.776	23.7317	18.5496	16.71	26.8125	14.7988	31.1116	17.283	25.2341	27.2113	26.0169	26.567	30.3422	24.367	37.8343	15.7554	21.885	17.7953	23.7872	10.0178	24.9743	30.8543	24.2545	29.6705	19.0859	27.4195
GPCho(18:1/0:0)	9.52505	9.23807	17.5725	13.6509	11.4832	12.1545	10.9071	14.3358	15.9343	15.2093	25.298	10.461	15.6176	23.0248	12.4781	23.0983	20.077	12.5365	25.3315	22.1286	18.7477	17.4661	25.5168	15.5935	14.2769	9.50914	17.4635	14.5506	21.5426	8.53965	15.5867	18.614	12.6182	20.1902	15.8117	11.7201	22.6363	17.4437	19.1818	18.0959	15.0916	7.90367	9.15166	24.5209	10.9385	16.5497	15.0758	18.3246
GPCho(18:2/0:0)	14.4507	10.5545	26.9015	14.786	12.001	17.4167	12.2765	15.279	17.6902	21.281	32.2489	14.2407	24.3317	7.67492	16.2595	31.4186	28.3494	15.7006	29.9281	30.7575	22.1235	22.7111	46.6399	22.313	22.0948	10.6088	18.2396	22.2808	28.631	11.1182	19.6535	23.9786	17.1496	24.41	23.3524	10.3395	34.5352	27.0226	26.6696	17.8955	18.8553	7.43784	14.9057	32.9915	12.9668	24.8832	16.5445	19.705
GPCho(0:0/18:2)	1.59256	0.825522	2.18471	1.39557	1.2049	1.62811	1.02716	1.14305	1.60499	1.87542	3.3641	1.6195	2.70903	30.6997	1.63654	2.66182	2.17389	1.57141	4.0616	3.29842	1.96821	2.12958	4.3021	1.75996	1.87927	1.1402	1.46979	1.94944	2.25388	1.29707	1.99314	2.83855	1.44829	2.4225	2.5083	1.2226	3.08589	2.27602	2.50077	1.39903	1.54652	0.844146	1.40653	3.32205	1.13263	2.37931	1.52279	1.90915
GPCho(20:4/0:0)	0.91789	1.14855	1.78944	1.2155	1.2551	1.29141	1.36152	1.50882	1.82386	2.13261	2.91359	1.40669	1.93502	7.67492	1.47628	1.69389	3.48027	1.34816	3.53182	2.25483	2.08507	2.27363	3.48131	1.65939	1.93012	0.959912	1.95437	1.4072	2.42725	0.757523	2.428	2.63064	1.29032	2.98917	2.04934	1.45649	2.80159	1.84426	2.29779	2.0111	1.94949	0.875411	1.06329	2.68188	1.19031	2.16908	1.69478	2.44428
GPCho(0:0/20:4)	2.5031	3.88747	4.89175	2.49499	1.85956	3.29448	2.19588	4.04447	6.45341	3.91663	9.10879	1.6195	5.43691	0	3.33331	4.23471	5.60116	2.99037	6.90161	5.83066	3.3265	4.41725	6.13772	3.61002	2.6953	1.96823	5.23353	3.94195	6.06813	2.59872	4.42473	3.67355	2.64617	5.9739	4.35239	2.09762	5.56338	4.42827	4.10452	4.22098	4.797	1.15804	2.2871	8.11704	1.99816	3.27278	2.80411	3.98676
GPCho(O-20:3/0:0)	1.17237	1.84259	2.81913	1.30553	1.40571	1.67065	1.26057	1.97368	2.70223	1.49443	2.65616	1.19388	2.45103	0	2.20467	2.17785	1.6662	1.28437	3.70841	3.43797	1.91032	1.58928	2.05986	1.8112	1.37755	1.08869	1.38333	1.94944	2.94738	0.813635	1.97278	1.84356	0.821113	2.02777	1.87349	1.36294	2.51728	1.75246	1.43513	1.48647	1.7374	0.750352	0.827363	3.21536	0.960249	1.38958	1.76357	1.43074
GPCho(O-20:3/0:0)	3.32735	1.80594	3.34328	2.12721	1.91083	1.9259	3.4539	2.76743	2.77673	7.59994	3.87897	2.07551	2.96704	7.67492	4.20579	4.23471	7.78237	2.43732	3.35523	4.27529	4.21621	5.69201	5.85555	4.29096	2.85096	2.94606	5.50924	1.78606	3.64088	3.24754	6.32838	5.20459	4.52591	5.44652	5.94865	5.94761	5.85338	2.58815	4.6236	2.4483	5.31038	2.02009	4.96558	4.78438	3.83949	3.80203	2.87428	5.73567
GPCho(32:1)	11.7643	16.4548	8.20707	12.8426	18.6122	9.43706	12.1011	11.0986	19.1839	5.49514	10.0326	11.4677	10.802	8.38366	12.1394	11.021	5.28421	12.366	15.3193	13.377	13.5888	7.40445	5.53206	11.5831	9.00617	7.92523	6.13176	15.8525	10.8132	7.96924	12.8527	8.62392	9.19309	5.03819	8.02178	11.7926	8.85605	8.37478	9.79903	18.943	6.86268	12.3053	5.43311	5.92306	8.90885	6.25759	10.1655	7.18932
GPCho(32:2)	4.1902	4.25103	4.01652	3.84556	5.21868	3.77609	5.5563	3.97502	2.96306	1.73095	2.55125	6.06593	4.86013	1.13484	4.70768	3.40988	2.30328	4.36858	4.09071	4.82484	6.60431	4.0311	2.85635	3.68817	4.37438	2.61331	1.75814	4.22433	2.54533	3.17386	3.83372	4.64082	4.18541	2.27379	3.43663	3.50389	3.32084	2.57211	3.67455	3.96992	2.86518	3.43253	3.05098	1.61886	4.99891	2.21818	5.27697	2.20782
GPCho(34:1)	78.7335	105.015	82.8125	100.254	107.84	82.5183	75.6634	89.6489	132.951	65.1776	115.668	104.426	125.992	202.906	76.8101	112.033	69.1589	86.1071	153.294	96.8984	90.9648	73.7423	73.3601	94.7237	77.7454	75.2286	85.4893	103.526	141.546	77.4795	76.5884	95.1197	89.5777	63.5744	81.1115	85.8946	90.5656	65.9483	87.1613	130.085	59.7052	93.7047	62.0651	85.4522	81.448	83.8762	95.467	78.7319
GPCho(34:2)	144.637	119.012	132.201	163.506	137.089	131.685	96.6651	121.719	145.872	110.001	142.815	147.632	197.469	223.766	111.189	174.95	102.979	127.081	208.915	140.763	154.608	112.524	128.335	149.702	119.682	108.411	120.287	146.828	210.775	118.082	97.8344	138.005	137.881	77.363	114.41	114.442	155.323	104.502	135.864	193.585	91.0114	136.803	119.292	115.508	119.082	157.767	128.201	100.175
GPCho(34:3)	9.26111	11.8689	10.5331	13.4253	14.6439	11.2371	13.6224	11.2608	7.42059	7.36497	6.5555	14.5841	11.4628	4.55114	11.2577	9.23836	6.64546	16.2206	10.2303	17.6917	20.3392	9.44276	9.02518	8.2018	13.3034	9.92895	5.09982	13.9819	9.44053	9.09835	8.49964	15.0347	11.0332	7.10414	8.33917	12.6952	10.1586	7.20522	8.99996	11.9543	6.12447	11.1757	10.2342	5.40551	11.6977	8.41849	13.8863	9.1127
GPCho(34:4)	0.567708	1.17829	0.790906	0.405536	0.942435	0.694186	0.846366	0.789242	0.956747	0.224729	0.57491	0.603823	0.828736	0.567422	0.732036	0.428152	0.428995	0.900784	1.06022	1.34475	1.32577	0.593011	0.409521	0.398523	0.73128	0.328998	0.278519	0.721001	0.299418	0.475086	0.782127	0.619306	0.605448	0.509863	0.544259	0.554773	0.396217	0.383775	0.539108	0.537253	0.635363	0.413653	0.33953	0.298932	0.801823	0.263274	0.944466	0.409262
GPCho(36:1)	29.2679	23.2642	24.3495	30.9018	35.0641	26.1993	27.1319	28.5497	30.5612	21.6604	32.9515	31.32	27.8376	55.1596	22.5708	41.0646	21.5186	26.5295	40.8168	30.75	30.5647	26.4123	34.4433	29.6076	28.6281	28.7556	24.6714	29.6881	35.7952	23.1754	23.1154	34.8601	34.2891	21.1065	23.392	36.7743	34.8901	23.1764	34.4154	29.493	28.5038	24.9807	24.5852	22.8271	35.5627	29.2307	31.2948	35.0047
GPCho(36:2)	90.5218	54.8425	84.3591	88.2921	70.4968	86.4461	64.2228	71.5999	72.1997	62.6334	92.0094	87.1931	107.975	188.998	74.3459	130.74	72.1358	72.3092	115.475	94.7135	91.7161	72.1017	96.7904	106.84	77.5073	79.3216	82.4958	82.8738	122.001	77.2451	59.4495	99.6326	96.7932	59.291	80.5291	77.9268	124.628	60.2749	86.3069	82.1764	69.6143	68.4883	93.6539	62.5385	84.0069	102.308	80.9897	80.3277
GPCho(36:3)	41.9785	52.4314	49.6021	54.8594	55.6735	48.8918	37.6548	45.5602	60.8588	35.59	50.5496	54.8446	55.3699	64.4643	49.084	48.8426	29.9335	38.3731	60.3005	52.7719	54.5049	33.3417	33.8858	52.9415	40.879	45.32	37.7781	45.863	64.2216	30.4282	33.9006	53.6185	34.9389	26.6689	45.7241	47.3671	44.1383	29.1753	39.5561	55.1614	34.8647	52.1673	30.7571	31.608	33.7013	35.6831	45.3421	38.1147
GPCho(36:4)	65.775	87.8913	59.1208	52.7472	64.402	57.5289	49.3644	60.3247	104.129	50.8472	93.7555	57.8557	99.0331	68.3065	55.3463	58.4273	56.2629	63.2879	87.7283	71.8766	71.4777	49.1012	48.869	69.9149	49.6139	49.5165	70.983	69.3946	75.6043	53.207	48.0935	58.0343	48.6623	45.1818	55.9414	45.3147	62.435	48.6137	52.119	91.6904	55.92	58.6366	29.9249	61.9159	51.4736	47.154	62.207	62.066
GPCho(36:5)	16.5626	34.9739	18.8566	20.9862	24.725	16.5089	11.9741	21.9565	35.6145	42.1405	27.9234	11.3722	33.43	18.1251	22.8022	9.02803	19.4339	49.9061	41.1535	32.4864	27.7357	20.8211	19.0622	23.3659	27.1357	24.8699	10.383	16.4464	18.7059	31.9962	22.609	25.2748	19.0072	27.9403	28.5276	15.2218	13.8668	16.0254	18.1371	15.4866	19.8732	17.1883	11.9892	20.7436	19.2854	10.4901	27.57	22.4679
GPCho(36:5)	3.96932	4.28019	4.73618	5.70473	5.78639	5.18397	1.8745	4.95789	9.80015	2.92919	7.61	2.66684	15.5727	35.5822	3.63024	11.9231	2.68615	3.07394	15.002	6.34591	6.09627	3.1443	4.31137	6.4287	2.86173	2.66717	5.27716	7.02095	18.8705	3.23547	2.21616	3.64761	5.40692	2.59352	4.39222	2.58442	6.36988	3.05748	3.99006	10.3351	2.63522	2.74743	2.87929	5.23459	3.36107	6.23507	3.79452	2.77811
GPCho(38:2)	3.93986	2.53053	3.0678	3.78738	3.83345	3.70563	3.10467	2.83954	3.28361	3.16436	3.7785	4.54107	3.22479	5.36229	3.25365	4.48631	2.28197	3.55069	4.20331	3.85032	4.16936	2.70268	2.98145	3.68806	3.16973	3.89379	2.53837	3.27195	4.14008	2.87809	2.99844	3.80278	3.29197	2.27376	3.48209	4.33344	4.01272	2.22537	2.90823	4.58158	2.52522	3.84687	2.76482	2.54923	3.20744	3.75298	3.21193	2.84653
GPCho(38:3)	1.10967	6.36256	1.03936	5.66599	4.33213	5.35996	4.26278	0.985505	1.41878	0.752336	1.03309	1.14532	9.97599	9.92021	1.203	4.15745	0.685498	1.22957	1.30902	7.2182	8.37455	5.8026	0.72865	1.168	1.02196	1.05805	0.889137	4.72361	8.0676	0.694655	0.975383	5.84049	0.832855	5.61621	5.41424	1.66753	1.12271	0.797385	0.726511	1.02242	7.40963	1.18865	0.66561	0.736773	5.12782	0.918952	5.6805	0.890659
GPCho(38:3)	22.7081	21.965	20.0206	22.2526	21.6353	18.2881	13.4701	17.9477	29.8912	15.653	24.4158	17.2841	28.007	35.5822	20.2567	19.0547	12.2601	16.4007	25.0324	27.0642	26.6488	15.1019	13.8208	27.0603	16.4243	22.3738	16.7802	17.5414	30.4985	16.4935	13.5652	21.2532	16.4356	13.3738	19.8358	31.7457	22.2563	13.2572	14.3411	18.9851	17.3787	15.4716	14.4979	15.8678	17.4489	18.8337	15.5747	19.419
GPCho(38:4)	5.9315	23.7837	6.88143	7.67125	21.67	5.98637	13.9265	23.4168	7.59341	26.4554	44.6783	12.9764	5.44209	9.92021	20.0254	5.66297	13.8865	24.0037	25.0877	41.5153	38.8688	14.8398	19.145	7.496	20.5913	21.4628	22.9736	6.52571	27.1336	13.0917	18.3402	7.28692	4.44061	12.2119	25.8245	10.1587	6.8961	16.3806	4.72414	6.51366	28.6941	7.35412	13.1897	22.4728	18.8286	5.70434	19.1678	34.5897
GPCho(38:4)	44.3869	44.4802	40.4641	27.1056	31.7729	36.8612	26.2006	32.777	46.4837	39.8884	58.1096	30.6343	55.2768	62.7032	42.6836	40.0785	46.7109	37.9042	51.5574	49.5376	46.0971	32.2851	36.6817	40.9066	31.8345	34.0428	54.426	29.8625	63.4072	36.2492	28.5011	37.909	41.4981	28.4847	42.9664	35.7683	38.7432	30.0359	38.4632	38.4311	41.5019	28.3166	37.6222	38.9338	36.9584	33.532	28.064	49.8836
GPCho(38:4)	2.86492	2.72009	2.88788	3.94232	4.31366	2.87848	1.94279	3.38184	4.42418	1.86528	4.79045	2.51696	4.20893	7.79587	2.56541	5.90834	1.92036	2.63582	6.10424	4.22063	3.90569	2.59808	3.576	3.75332	2.69585	2.05305	3.32632	3.74658	5.81484	2.27427	2.29271	2.63186	3.62016	2.1039	2.72366	2.86104	3.96948	2.20226	3.29889	3.8824	2.28526	2.62284	2.21542	2.80195	3.20745	3.69264	2.93451	2.7895
GPCho(38:5)	9.22083	11.9558	8.32786	9.86064	9.4945	7.77835	7.6964	8.00257	10.864	11.6374	14.0386	10.9369	11.6279	5.01465	9.44564	9.02799	9.53971	9.83093	9.98716	7.98146	7.96603	8.73948	9.00592	13.8583	6.58587	9.22466	7.91772	8.13847	11.6955	10.1976	9.69111	9.5864	10.8537	9.50412	12.9418	9.54103	9.46097	8.26414	9.28533	9.54275	6.99942	9.6316	9.79996	11.4303	10.0139	8.95871	10.6833	7.90687
GPCho(38:5)	12.2968	13.3199	14.6957	16.2607	11.7674	14.378	8.4608	14.8423	22.0209	13.9788	18.5516	13.1008	20.2137	20.4939	14.0953	12.8252	12.6976	14.1311	20.1749	18.8291	16.0505	14.0266	14.9858	17.3762	11.5437	11.5536	15.3453	12.2571	22.0522	10.7182	11.9659	17.9855	13.9601	12.6158	18.0243	12.7142	16.5285	11.2036	13.3634	17.4571	11.1147	11.8277	10.4045	15.8682	11.0378	13.9727	12.8943	12.85
GPCho(38:5)	4.84405	7.53119	5.05126	4.69764	6.53036	4.81438	2.49773	5.8782	12.8949	10.4477	9.34793	2.61686	10.5542	16.7709	6.24396	4.9175	4.49839	9.44325	12.296	8.87557	8.6015	5.40209	4.88431	7.98276	5.05043	5.33959	4.55003	4.74533	10.9111	7.00212	4.93172	5.87206	5.93652	8.1029	7.64838	4.3582	5.44	3.72419	4.53095	4.52333	8.47033	2.28651	3.37145	11.2663	5.31403	3.8737	5.69602	6.2567
GPCho(38:5)	3.99876	3.27414	4.8016	5.51106	4.64611	5.02557	2.04524	4.73758	6.64264	3.06357	6.57901	2.89159	11.6692	31.9402	3.40948	10.5002	2.96267	3.11258	11.2429	5.62388	6.07599	3.307	4.97185	6.3417	3.2882	2.88264	5.24169	5.87436	14.6861	3.37101	2.35014	3.94385	5.37046	2.55354	4.4984	2.60654	6.70252	3.27705	4.23045	8.02232	2.57522	2.90934	3.25699	5.01188	3.41227	6.39264	3.64193	2.88075
GPCho(38:6)	5.45368	5.04111	6.29578	4.5427	4.40601	4.00483	4.36786	4.75453	3.74206	5.79839	6.53194	4.82052	5.67656	4.08757	4.12648	3.86491	6.04347	5.53642	5.83597	6.21507	6.19769	4.73329	5.3745	5.14539	5.10345	3.52008	4.72737	4.89732	4.14009	4.31572	4.48409	6.37718	3.82072	4.32676	5.15965	3.67723	5.91575	4.40954	5.02676	4.78949	5.07842	4.16744	3.94453	3.86409	3.69389	3.39089	5.32353	5.91976
GPCho(38:6)	47.0635	63.7651	36.3019	43.325	49.6302	35.9205	37.021	37.3065	58.8047	65.1757	61.5276	56.2337	68.8384	22.1848	46.2242	40.9307	46.711	51.0948	49.2681	34.2226	37.4232	42.4841	42.046	74.2631	30.9732	45.3195	35.5656	35.4169	56.698	53.4349	44.6958	42.2683	57.6095	51.9114	61.8366	39.3961	41.8259	45.6123	48.022	42.8264	30.8661	43.6618	54.5145	57.8672	45.8232	47.5587	58.6044	35.6264
GPCho(38:6)	3.18888	3.7553	3.73843	4.3684	4.3506	3.86404	1.59275	3.6191	7.10362	2.34684	4.74339	2.46701	8.81965	10.2749	3.24067	6.22382	1.87782	2.4812	8.56944	4.66889	4.91985	2.29593	2.825	5.18889	2.3286	2.45168	3.85837	4.52821	7.92055	2.24963	1.83333	3.05509	3.09143	2.04395	3.20906	2.50695	4.33711	2.06358	2.57769	6.88313	2.10528	2.64776	2.14675	3.43581	2.55459	4.41686	2.90678	2.20778
GPCho(38:7)	3.36558	3.40537	4.00013	4.54271	5.12632	3.96963	1.77204	4.26307	7.33412	2.32444	6.46135	2.59189	10.9259	11.8117	3.26664	7.24034	2.17563	2.84199	9.98717	5.56541	5.28495	2.76079	3.54471	5.16714	2.7077	2.61329	4.42589	5.5921	12.3329	2.48377	2.09173	3.32313	3.6384	2.17385	3.40626	2.17499	5.31025	2.57208	3.86985	8.73047	2.28526	2.68513	2.31844	4.24098	2.56739	4.57779	3.21194	2.44731
GPCho(40:6)	0.436813	0.523144	0.485205	0.557611	0.483422	0.476	0.573537	0.413996	0.452467	0.581409	0.718638	0.648306	0.396352	0.794391	0.419649	0.611645	0.495315	0.359752	0.42409	0.442109	0.566291	0.437688	0.491681	0.935453	0.227395	0.424961	0.433251	0.397807	0.684384	0.475079	0.729916	0.619291	0.719146	0.456435	0.81453	0.53504	0.718115	0.476438	0.485558	0.564116	0.394381	0.657799	0.502449	0.645194	0.482117	0.561652	0.571837	0.308503
GPCho(40:6)	15.8184	14.0604	9.73709	13.6107	14.2249	9.43706	8.82894	9.69208	16.3357	15.4478	16.6676	11.3874	19.1462	13.7386	14.58	15.6098	14.3209	13.2824	15.3193	13.0038	14.9203	14.3609	13.9373	23.5689	8.81175	14.75	13.4095	8.64865	17.0054	17.2495	14.4178	13.1823	22.5673	13.8282	20.4556	12.7751	14.3696	10.5387	14.0648	9.78391	10.1405	11.3968	18.0585	16.3779	20.4251	12.8997	12.8461	12.8067
GPCho(40:6)	1.81499	1.90749	2.26368	2.36888	2.19057	1.85887	1.03635	1.74281	3.74199	1.48631	2.55116	1.33055	3.9408	5.47815	2.14984	2.38661	1.17269	1.45659	3.19971	2.91856	3.17544	1.29216	1.44944	2.76329	1.28426	1.66516	1.98833	2.03154	4.49649	1.47298	1.15288	1.87232	1.70595	1.11098	1.94141	1.76554	2.66545	1.08135	1.39193	2.93795	1.23239	1.35036	1.54073	1.80945	1.84431	1.6988	1.46509	1.34227
GPCho(40:7)	3.58644	3.68238	3.91833	3.14823	4.0366	3.75841	1.88301	3.97496	6.46974	3.09716	7.09675	2.64182	6.71331	9.80191	3.40947	5.01692	3.09029	3.26719	5.95084	4.92223	4.91982	3.19078	3.77938	4.8626	2.52998	2.73179	5.0466	3.96365	8.21458	3.09989	2.37884	3.22435	3.87538	2.4636	4.31637	2.84996	4.85608	2.81476	3.32892	4.49413	2.75519	2.74739	2.79915	4.05251	3.04101	3.31037	3.15643	3.24574
GPCho(40:8)	0.659531	0.653042	1.03935	1.40666	0.975316	1.08631	0.313934	0.849614	1.72678	0.62132	1.22178	0.503679	2.32804	3.29105	0.697304	1.66365	0.599545	0.646006	2.28338	1.09865	1.36259	0.738467	0.994189	1.28426	0.530612	0.549742	1.14305	0.933774	3.24893	0.529971	0.505397	0.986179	1.04401	0.589965	1.04658	0.613907	1.41344	0.620584	0.820208	1.51616	0.465643	0.580116	0.543238	1.08857	0.58476	1.18778	0.60891	0.72479
GPCho(O-32:0)	3.15947	1.62121	2.06257	2.02772	1.79669	3.12495	2.07087	2.26528	2.3545	2.55965	2.98987	2.56696	2.10734	2.72363	2.12397	2.13215	2.22884	2.35239	1.99473	2.32974	1.99195	2.09841	2.35789	2.41852	2.12726	2.26856	2.18603	2.3135	2.23956	2.52078	1.69938	2.82941	2.26459	2.06397	1.98455	2.21929	1.88517	2.16763	3.10361	2.12439	2.10532	2.47341	1.94078	2.45205	1.9914	2.06892	2.62941	2.32188
GPCho(O-32:1)	1.47344	1.29754	1.05425	1.23069	1.39185	1.82629	1.67815	1.71144	2.04029	1.68772	2.5076	2.01752	2.10734	1.4753	1.38367	2.16369	1.75024	2.03027	2.03082	1.53959	1.43637	1.16287	1.37815	1.77754	1.39418	1.16798	1.59439	1.73488	1.97748	1.85709	1.46969	1.9258	2.11181	1.14809	1.65849	1.05591	1.45279	1.65418	1.82394	1.84539	1.25137	2.19937	1.46498	1.41557	1.56585	1.47945	1.91977	1.45993
GPCho(O-34:1)	5.6514	3.4783	4.29457	4.21352	3.6673	5.32476	5.01937	4.19532	3.79668	4.91206	5.80245	6.77294	3.67526	6.52127	4.24272	3.99502	5.06167	4.98855	3.60476	4.3766	4.18972	3.84905	4.31137	4.42768	4.37438	4.70149	4.95795	4.74539	4.95111	5.5153	3.60884	6.73128	4.62297	4.06962	3.55798	4.9525	5.05079	4.6811	6.72476	4.61087	4.49742	5.29642	4.57207	4.75493	4.16814	5.28192	6.05299	5.38628
GPCho(O-34:2)	2.89442	1.66177	3.6894	2.88203	2.74844	3.6353	3.53454	2.9752	1.52149	2.38047	4.15515	6.235	4.20902	3.51802	2.3577	3.40988	3.14348	2.97088	2.6108	2.36589	4.49396	2.77243	5.21694	2.41852	3.18159	1.83762	3.4328	4.3763	3.65005	4.16405	2.8191	3.78869	4.56827	3.6224	2.15679	3.09342	3.23853	2.9997	4.12529	2.15237	1.83536	2.61043	3.33712	2.68212	4.36867	4.77901	2.90682	2.81233
GPCho(O-34:3)	5.61844	3.09922	3.98381	6.56607	5.18174	5.20157	4.74615	4.7376	3.79668	4.37323	6.64963	7.46459	6.14568	5.47826	4.01024	7.87137	5.27112	5.47875	5.7978	4.18171	4.16944	3.97908	4.88431	4.18843	5.01066	3.10889	5.01115	7.06954	4.4075	5.74325	3.49104	6.80073	6.54853	4.51683	3.51247	3.31472	6.28339	6.5669	6.08591	4.78963	3.71429	5.04554	5.34858	4.89198	5.7867	6.0061	6.05299	4.86259
GPCho(O-36:3)	1.80119	1.12528	1.41101	1.99179	1.79669	2.00582	1.85743	1.90003	0.85466	1.49697	2.13709	2.25477	1.5186	2.49666	1.32345	2.13214	1.83532	1.91748	1.59774	1.30932	1.3995	1.24909	1.60909	1.46125	1.84293	1.15799	1.54603	1.95193	1.71539	1.74048	1.11742	2.11268	2.09489	1.90409	1.21204	1.72135	2.02347	1.94805	2.13637	1.70822	1.40274	2.36129	1.91788	1.66652	1.68691	2.0316	2.26876	1.74054
GPCho(O-36:4)	8.04101	5.4979	7.22917	6.19767	4.81236	8.01465	4.7987	6.99697	7.33415	5.41244	10.8234	7.12645	12.4126	9.21113	5.82648	7.45074	5.89947	7.41697	7.3544	8.46122	7.92064	6.18881	7.79272	9.37001	6.45464	4.56888	8.03678	9.01306	10.9112	7.86813	6.4773	5.6195	8.13977	7.72605	6.68718	5.32063	6.67833	6.55267	7.96435	7.6837	5.50914	4.64134	4.72575	8.32166	4.75541	6.93287	6.2082	6.14438
GPCho(O-38:3)	0.949086	0.808932	1.00963	0.936463	0.662684	1.29426	0.814683	0.80433	1.00808	0.894833	1.36857	1.11128	1.18906	1.36181	1.02579	0.948051	0.849826	0.947611	0.812838	1.09866	0.601684	0.801851	0.923807	1.16801	0.914302	0.900031	1.01555	0.991816	1.24045	1.13022	0.625551	1.03748	0.914078	0.680339	0.706429	0.914326	1.02638	0.860411	1.00938	0.859605	1.09319	0.836828	0.81053	0.81309	0.848344	0.918957	1.12094	1.00469
GPCho(O-38:5)	6.65646	3.31789	5.14277	5.53043	3.57491	6.77405	3.55365	4.90705	6.58505	5.15055	9.76925	5.44929	8.2828	8.85637	4.41708	6.11871	5.74239	5.60851	6.82773	6.04061	5.73118	5.45931	5.84718	6.86322	4.6395	4.05051	7.04458	6.28689	9.78358	4.89483	4.42519	4.73553	6.12012	5.23497	5.0069	4.5563	5.67788	5.47162	6.52302	6.91395	4.62308	2.90935	3.21121	7.74407	3.61709	6.1268	4.74927	5.70918
GPCho(O-38:6)	1.00262	0.913249	1.11369	1.24827	0.860147	1.1823	0.783046	1.09227	1.88315	0.894835	2.39844	1.05454	2.36488	3.17757	1.02579	1.35137	1.04449	1.08814	1.74209	1.32702	1.49165	0.875788	1.10796	1.42169	0.882004	0.88045	1.69233	1.16592	2.19586	1.56555	0.966516	0.782696	1.39054	1.5058	1.17067	0.803706	1.10345	1.07065	1.36442	1.46132	0.926285	0.646714	0.883349	1.39998	0.987956	1.20573	1.00748	1.04616
GPCho(O-38:7)	1.05615	0.640061	0.616024	1.19547	0.810782	0.662822	0.558031	0.849629	0.905406	0.87448	1.24277	0.884304	1.88655	1.13484	0.627901	1.35137	0.646936	1.00617	0.989542	0.699292	0.800051	0.706899	0.868053	1.22615	0.774337	0.733577	0.636332	0.759688	1.41154	1.14161	0.860401	0.74499	1.47339	1.06468	1.11553	0.723255	1.04565	0.965446	0.954763	0.617841	0.483467	0.904758	0.84174	1.07302	0.88325	1.04442	0.919241	0.531209
GPCho(O-38:7)	0.67266	0.458196	0.688888	0.694896	0.531764	0.89802	0.390001	0.774136	1.26477	0.401823	1.2847	0.470308	1.70257	1.81575	0.41965	1.00922	0.447943	0.623056	1.06022	0.73402	0.836194	0.510171	0.909871	0.877329	0.530619	0.357773	0.715336	0.856409	1.54067	0.650747	0.428664	0.481042	0.849106	0.44754	0.544257	0.357594	0.910786	0.51763	0.632812	1.26931	0.421109	0.304307	0.420875	1.01151	0.390906	0.721804	0.608918	0.561696
GPCho(O-40:4)	1.17658	0.873871	1.02448	0.643129	0.695591	1.48618	0.941351	1.16926	0.703837	1.11018	1.34758	1.26107	0.648576	0.680907	1.20299	0.795139	1.41157	1.30126	0.742157	0.90765	0.442415	0.886336	1.16483	1.42167	1.04349	0.841272	0.999734	0.875746	0.941028	1.22159	0.59075	1.19132	1.10899	0.743898	0.787505	0.823807	1.25757	0.965433	1.44767	0.994991	1.45945	1.29261	0.831325	0.874132	0.825064	1.06233	1.568	1.51383
GPCho(O-40:6)	0.607058	0.343468	0.514014	0.660384	0.402852	0.756894	0.38239	0.547656	0.804386	0.874468	0.760522	0.50368	0.936832	0.567422	0.489064	0.581063	0.685495	0.668968	0.45943	0.664561	0.601684	0.655119	0.798343	0.780431	0.49895	0.415363	0.65213	0.454637	0.812706	0.486059	0.445713	0.606726	0.800366	0.616764	0.733451	0.456176	0.603759	0.517624	0.753281	0.69843	0.501277	0.369516	0.502451	0.965708	0.41369	0.721801	0.670702	0.551527
GPCho(O-40:7)	0.777605	0.445236	0.442392	0.79842	0.531764	0.694177	0.397603	0.532558	0.6787	0.701444	1.13792	0.614935	1.62897	1.58878	0.54691	1.0398	0.590073	0.657489	0.812838	0.510126	0.727763	0.696535	0.672891	1.26489	0.520059	0.568942	0.604729	0.606182	1.1549	0.917427	0.539506	0.719843	0.9628	0.916439	0.787508	0.733301	0.698849	0.692661	0.954748	0.779017	0.385474	0.557923	0.553438	0.980972	0.607572	0.829337	0.695418	0.521041
GPEth(36:1)	6.90616	14.3686	8.90496	13.1499	18.5024	8.49658	13.3043	17.2914	11.6356	7.77111	11.0668	17.3309	23.8917	12.5862	11.2243	15.9199	7.35219	9.65641	22.8814	17.0467	10.4058	9.7763	12.883	9.14676	8.10721	11.0968	9.81656	14.0948	15.9544	10.1988	10.6819	9.23209	12.6677	10.3786	10.0965	8.33929	12.023	9.61707	8.61098	13.5429	9.46289	10.3884	7.12519	13.2201	11.5422	7.5376	12.8885	7.9919
GPEth(36:2)	9.01583	8.56874	9.20527	11.0855	11.0947	8.49658	11.5415	12.5441	6.75782	7.5867	7.85805	19.5287	26.6871	7.19213	10.3341	14.2125	7.431	8.59275	14.2833	13.4546	9.07032	10.8594	13.402	6.176	7.59201	9.4257	8.03028	11.1529	10.659	10.2461	7.82568	10.2089	11.5326	8.46007	8.87729	6.39344	10.2066	8.33523	8.61098	12.1034	8.37756	9.74077	8.93398	10.9752	11.2352	8.39992	12.3743	7.56354
GPEth(38:1)	9.17527	13.723	12.8572	17.2133	17.9623	10.7536	15.0616	19.9936	10.9886	12.5194	16.5073	22.2288	27.9294	23.4238	12.7236	23.2091	9.91365	12.6878	21.4038	18.8075	14.5669	14.8474	14.6996	10.3819	10.1284	17.1475	16.0154	16.0382	21.8424	12.5643	13.7859	13.088	15.0087	17.3998	15.538	14.2167	19.3981	12.6555	11.2991	15.7022	12.4682	14.0429	11.2402	18.9664	13.9984	14.3005	14.3741	13.4209
GPEth(38:2)	17.3128	17.0155	21.4485	27.9309	23.2727	18.7707	19.8337	27.3549	15.8314	21.2597	21.21	38.5185	50.2109	25.2599	20.1839	30.8641	17.109	18.8051	31.1779	28.6481	29.4706	23.9166	30.9578	20.2871	16.9842	25.2763	23.4787	22.5115	30.1563	21.3874	19.1286	24.532	23.9725	22.7667	23.435	19.9902	35.4221	20.4524	17.4695	27.2363	18.8655	22.6425	22.4119	29.1867	22.101	24.7956	24.1674	17.639
GPEth(38:3)	2.09729	2.83414	2.72987	3.1234	2.90878	2.49676	2.26715	3.26045	2.1118	1.85954	2.12485	4.17816	8.34904	2.39738	2.34906	4.18864	1.58956	2.19262	6.61297	3.43989	4.10248	2.33686	3.19508	2.46075	1.77513	2.73516	2.24061	3.80946	3.95079	2.20345	2.06144	2.62351	2.10446	2.30638	2.21399	2.08293	2.42284	2.50721	1.6707	3.49853	2.07172	2.7315	1.74343	2.91684	1.92723	2.43497	2.45747	1.9187
GPEth(38:4)	2.95002	6.2804	4.14879	3.27118	4.1919	2.60468	4.08598	6.34482	3.60249	4.06084	5.48919	5.71952	10.7401	2.99672	4.949	4.00653	3.72403	3.52466	5.73361	7.80636	3.33327	3.88937	4.24084	2.75468	2.30479	3.87143	4.66708	4.80078	3.95079	4.47093	3.91019	3.12741	3.17753	5.23931	3.96338	2.21891	3.48624	3.62103	2.73011	4.41068	4.76755	3.57031	2.91469	7.11152	3.43771	1.96048	5.03307	3.18932
GPEth(42:6)	2.23938	2.83409	2.05123	3.4189	3.55029	1.95716	1.59623	3.5925	3.85094	4.27093	3.76142	3.16353	11.349	2.99672	2.84992	4.73499	2.61161	2.42951	3.99615	3.62445	2.94866	3.26283	3.54184	4.38057	1.63386	3.19718	3.09399	2.55922	7.40772	3.7374	2.709	2.66926	4.25194	5.23918	5.28593	2.0149	4.72323	2.88784	2.45369	3.72424	1.49149	2.03078	3.61328	7.80584	3.11253	2.84916	3.06832	1.65152
GPEth(O-36:3)	2.71316	1.57717	1.93826	3.04951	2.35592	1.69086	2.53732	3.0944	0.869566	1.48986	2.56448	3.97416	3.27998	4.79475	1.43076	4.37076	2.08114	3.28299	2.25869	2.62096	4.35889	2.24914	2.5014	1.80937	2.84261	2.8892	1.89051	2.64747	2.71616	2.54069	2.4033	3.08161	2.04256	2.53131	1.71141	2.35525	3.3213	2.42262	2.17738	1.57998	1.94279	2.48421	2.67012	2.83351	3.39121	3.40147	2.50839	3.38399
SM(d18:0/16:0)	1.94047	1.19154	1.41102	1.60032	1.25757	1.51821	0.933462	1.2925	1.857	1.44399	2.1157	1.34218	2.66186	2.61014	1.15562	2.6734	1.30096	1.135	2.06691	1.46874	1.3995	1.14132	1.29283	1.54032	0.882016	1.16798	1.49768	1.81381	3.33815	1.78713	0.92215	1.29392	2.3336	1.14809	1.63035	0.854	1.29614	1.1564	1.64279	2.06842	1.3649	0.904769	1.31513	1.35329	1.31653	1.60744	1.28504	1.38464
SM(d18:0/18:0)	1.8708	1.19154	0.528588	0.815688	0.467308	0.429935	0.435645	0.638252	0.982417	0.57145	0.844396	0.626075	1.0089	0.567422	0.836977	0.795139	0.580613	0.531219	0.45943	0.493122	0.530898	0.822989	0.742603	0.607273	0.446182	0.988169	0.69954	0.991828	0.983802	1.21019	0.233803	0.53132	0.702914	0.394128	0.344093	0.703152	0.377349	0.363182	0.606043	0.671567	0.671711	0.524638	0.696221	0.508185	0.618991	0.614307	0.547131	0.480401
SM(d18:0/20:0)	2.12161	1.40485	1.42588	1.74113	1.35828	1.37426	1.18969	1.32331	1.80463	1.47578	2.13709	1.7283	1.96016	1.70227	1.79724	1.60123	1.40156	1.63705	1.48947	1.39789	1.49167	1.35688	1.42081	1.36241	1.28431	1.35859	1.38486	1.55729	1.80275	1.55392	1.05529	1.73891	1.65567	1.02762	1.22583	1.25089	1.27688	1.11353	1.24154	1.46134	1.55541	1.57079	1.34697	1.49341	1.31653	1.58915	1.46514	1.74055
SM(d18:1/14:0)	3.49814	2.18352	2.74075	4.21352	1.9166	2.86097	3.2193	2.68712	3.17682	3.25396	2.98987	3.70328	2.5121	1.13484	2.96801	2.54597	2.7606	3.18992	3.19981	3.30471	2.18006	2.3657	3.32572	2.92806	3.4896	3.02271	2.13644	2.57527	2.45797	3.43263	2.77125	2.97048	3.51084	2.40368	2.84507	2.79467	2.52486	3.06904	2.44253	2.54412	4.56455	2.94674	2.95942	2.50068	3.82191	3.1697	2.62941	3.90539
SM(d18:1/15:0)	4.531	2.66183	3.64033	6.08932	3.0209	3.98727	4.08414	3.48358	4.17836	3.34355	5.21413	4.72272	5.24685	2.83711	3.96786	5.18299	3.71296	3.07395	4.7669	4.47404	2.50014	3.55105	4.54605	4.25368	3.26452	3.89379	3.96483	3.70325	4.58736	4.61906	3.20191	3.95797	5.93652	2.63349	3.63382	3.40484	3.38571	3.67246	3.65952	4.64001	5.33685	3.86081	4.57207	3.82988	5.01323	4.87959	3.3368	4.91364
SM(d18:1/16:0)	33.7369	18.2645	25.224	28.8313	27.1658	29.0219	19.7307	26.1341	38.2779	25.8514	32.1352	28.1583	44.4421	25.5671	27.4303	48.2954	26.2626	23.3152	38.2693	30.7501	27.6659	22.0637	34.4438	29.6761	25.8693	22.5663	32.722	28.0444	45.6686	30.4374	17.6584	30.5541	37.8632	23.4214	24.4733	19.2332	31.8076	20.7054	30.3997	40.8424	27.8003	24.3151	29.7172	30.3872	31.8425	32.457	28.072	28.1857
SM(d18:1/16:1)	5.19006	3.15754	3.60762	5.08501	2.76592	4.65602	5.05089	3.73778	3.20354	4.43589	4.29635	5.56107	3.63773	1.13484	3.43547	3.24734	4.546	4.12348	2.86849	3.79193	4.04774	3.21404	3.24749	3.84042	3.84415	5.33959	3.73428	2.84062	3.38271	4.72937	3.6838	5.22487	4.40419	3.07457	3.52764	5.29339	3.15668	2.84947	3.44918	3.50912	3.32272	4.23714	5.60216	3.04187	5.17079	3.20993	3.00391	3.57356
SM(d18:1/18:0)	9.88539	5.90576	6.73502	8.47305	5.68306	6.95128	4.25227	6.54188	9.60673	6.46001	9.21627	5.97371	12.5365	11.339	7.53857	11.2171	5.55912	6.2275	8.61007	6.3023	6.6497	6.1459	7.86975	7.71504	4.81182	7.218	6.98505	7.11813	13.0683	9.49105	3.46963	6.55764	9.66434	4.77993	4.78625	5.71559	6.32664	5.01732	5.96823	10.0251	7.43698	5.92826	7.77772	6.17225	7.28971	7.76571	5.12176	7.06452
SM(d18:1/18:1)	4.45525	2.66183	2.98609	4.17479	2.92856	3.58251	2.72255	3.05993	4.01478	2.9292	3.94336	3.3911	5.20778	2.04272	3.30562	4.15756	2.27138	2.86779	3.82775	2.77117	3.78407	2.72595	3.26313	3.27796	2.48265	3.90585	3.37959	3.08716	4.90564	3.84692	1.46969	3.43601	3.85724	2.01401	2.09938	3.61532	2.87019	2.07518	2.77307	4.61087	2.26529	2.99657	4.12382	2.69925	4.34002	3.01267	2.29652	2.28766
SM(d18:1/18:3)	4.29327	2.86595	5.05126	5.31741	5.05246	6.12421	2.27576	4.89011	6.95963	3.36595	6.36723	3.22877	9.64571	6.1736	3.74711	10.9033	2.98395	2.85491	8.61007	5.03922	5.38639	3.43484	5.46203	6.40696	3.28821	2.71027	5.77457	5.07106	11.3525	4.17784	2.09176	4.71974	5.49809	2.33374	4.01302	2.89425	6.65413	2.9188	4.99313	8.02237	3.47935	3.45745	3.5219	4.48084	3.7579	6.28009	4.03033	3.27997
SM(d18:1/20:0)	10.4291	6.67254	8.08627	10.4804	6.42703	6.61651	6.17511	6.94008	9.80015	8.13074	12.1268	9.08333	9.43923	9.80222	9.07271	8.15177	7.77998	7.52798	7.31391	8.0905	6.94474	6.71806	8.2549	7.44733	6.83375	7.79263	7.42162	8.23565	9.44053	8.44111	4.97883	8.06828	8.67696	5.75149	6.04223	5.71559	6.19689	5.52852	6.32128	9.54275	7.92761	8.46461	8.62298	6.82398	8.2436	8.9362	6.65259	9.61269
SM(d18:1/20:1)	2.24702	1.56712	1.84904	2.40555	1.9166	2.0548	1.40496	1.7743	2.72258	1.95492	2.70403	1.75193	3.22486	3.17757	1.8341	2.35483	1.97359	1.61267	2.64761	1.699	2.31174	1.37843	1.66713	2.01508	1.36122	1.75143	2.08709	1.9322	4.14016	2.29897	0.869108	2.11269	1.99344	1.32619	1.36369	1.53147	1.76725	1.10282	1.65672	3.05226	1.29867	1.97516	2.41004	1.74596	2.081	2.10623	1.6967	1.53548
SM(d18:1/22:0)	19.5005	13.8458	17.0788	20.9136	14.5318	13.5282	11.3412	13.6665	16.4066	15.6808	20.5777	16.8701	19.6545	22.3151	15.6747	16.6387	14.3466	16.2446	12.7812	17.4537	13.034	13.7019	14.2715	15.5241	12.6647	13.4721	14.4628	14.9617	20.0773	14.4366	10.1519	14.4028	19.0978	11.6686	13.882	12.7978	14.2809	10.8405	11.4223	15.2592	13.7538	15.5507	15.2984	15.8419	15.7708	17.4992	12.422	16.3704
SM(d18:1/22:1)	11.2969	7.56709	10.3542	11.7438	8.36961	8.80888	7.72317	7.6796	10.0258	10.5049	11.7503	10.8626	11.5454	14.2214	9.49892	10.7105	8.40042	9.37277	10.1087	9.34731	8.41994	7.37266	8.85187	9.80809	7.90447	9.30685	8.63671	9.11024	11.8427	9.88183	6.21553	10.3388	10.1805	7.04948	8.04045	7.36789	8.25112	7.39487	8.29723	9.95616	7.64209	9.14602	9.62797	9.73438	9.34652	9.72251	7.7623	9.02626
SM(d18:1/22:3)	1.66461	1.45893	1.33668	1.72351	1.50934	1.26228	0.862195	1.43111	2.19738	1.17251	2.05152	1.20319	2.32809	2.26969	1.41979	1.7886	1.17272	1.17012	2.0669	1.46873	1.39949	0.981412	1.43502	1.481	1.13048	1.17796	1.48155	1.65594	2.54531	1.07423	0.756027	1.1657	1.5231	0.89829	1.23961	0.904276	1.18053	0.923437	1.02304	2.04042	1.07465	1.31574	1.31512	1.27543	1.25716	1.7354	1.09573	1.33173
SM(d18:1/24:0)	11.8967	7.20817	10.22	10.4566	6.19971	5.51376	8.16289	6.54188	6.03759	11.9721	9.87458	11.6285	9.06741	13.8593	9.7653	6.32895	8.96172	10.7796	5.06938	7.87243	6.37736	7.96072	6.95009	8.34782	7.59664	9.59824	6.42942	6.61256	7.38811	8.03665	7.1579	8.18983	10.3151	7.26812	7.18163	6.23313	5.63461	6.0406	6.10272	6.39049	8.43995	8.85642	9.31621	7.80158	7.73088	8.2159	6.80624	10.3165
SM(d18:1/24:1)	2.71766	1.60764	2.24823	2.40548	1.98506	1.21428	1.82326	1.9157	2.2759	2.64921	2.72578	2.52944	2.51203	3.51802	1.98148	2.38663	2.06926	2.09463	2.17513	2.22123	2.51926	1.68536	1.8267	1.63912	1.67321	2.33317	2.20275	1.9519	2.98205	2.43447	1.46964	2.36381	2.36803	1.89406	2.01319	2.14179	1.96375	1.7862	1.96571	2.37617	1.02827	1.81826	2.20397	2.016	2.01693	2.1435	1.74908	1.76293
SM(d18:1/24:1)	40.372	26.6414	35.7159	35.3878	27.1655	32.1574	24.9591	23.5328	30.3217	35.9966	39.6462	32.194	37.0417	45.2628	26.7355	35.6678	27.2399	30.8939	25.5863	30.0552	28.3959	24.9624	29.7035	31.2172	29.261	27.3863	31.4574	30.2486	39.6826	33.3373	22.6035	31.5589	37.8624	25.7622	26.6353	26.5579	27.8351	26.8828	28.7927	35.6638	27.9582	24.9805	26.6264	27.0289	23.8467	32.0982	25.5924	31.6871
SM(d18:1/24:2)	15.4239	10.5857	13.5849	15.1502	13.1819	14.4841	11.5147	10.8668	14.3854	14.2772	15.4124	15.3052	14.6947	17.3863	11.8432	14.394	11.3169	12.2347	13.5063	12.5507	13.7552	9.82756	10.5034	16.0595	10.6974	13.1442	13.264	12.7381	17.4991	13.2377	8.8489	14.4724	13.7856	10.632	11.241	11.2414	12.3944	10.954	11.5949	14.5013	9.41062	11.4171	11.9889	12.2737	11.9422	13.1198	11.1019	9.9037
SM(d18:1/24:4)	1.40513	1.12526	1.42586	1.7411	1.39182	1.40622	0.806762	1.35409	1.88314	1.36983	1.77346	1.21476	2.5492	2.26969	1.23913	1.94472	1.26148	1.32517	1.9947	1.55727	1.41791	1.13052	1.22171	1.7182	1.0758	1.21791	1.51377	1.85324	2.2832	1.33587	0.790811	1.3331	1.5728	0.962737	1.22581	0.924379	1.23831	1.00745	1.18689	1.87278	0.844349	1.31572	1.30448	1.68238	1.1741	1.8268	1.0453	1.00469
SM(d18:1/26:3)	0.672648	0.730979	0.645162	0.90194	0.695589	0.631457	0.473661	0.547656	0.804386	0.651249	0.92825	0.570429	1.04493	1.02136	0.743578	1.13276	0.476363	0.623045	0.88352	0.959735	0.854252	0.479102	0.686826	0.877318	0.593937	0.588134	0.683728	0.74034	1.32599	0.650733	0.496869	0.669564	0.784118	0.456434	0.679391	0.653337	0.679583	0.538213	0.646189	0.96756	0.492365	0.580115	0.573828	0.752029	0.527735	0.793488	0.65834	0.622656
SM(d18:1/26:5)	2.06578	1.48594	2.31011	1.84805	1.8309	1.53416	1.06847	1.60137	2.59009	1.79806	2.72575	1.26107	3.07463	4.31933	1.51609	2.64146	1.43168	1.63699	2.24729	1.87781	2.14237	1.43243	1.49297	2.43861	1.26229	1.593	1.97189	2.11207	3.60537	1.84534	1.06413	1.81893	2.061	1.35449	1.78503	1.25085	1.7672	1.52288	1.69847	3.08071	1.20443	1.51208	1.48658	2.33847	1.45894	2.18079	1.51655	0.994314
ChoE(16:0)	3.83488	2.58437	4.00817	3.97877	4.30409	5.61167	2.14012	4.14255	7.8308	3.59886	3.97895	3.18319	12.7513	14.8815	2.0128	11.6454	2.27495	2.26365	3.99179	29.7436	7.00775	1.73977	1.9651	3.07816	1.73928	2.12833	4.59149	5.64489	14.8444	3.22871	1.70719	2.71713	5.75944	3.33233	3.95146	0.481706	3.30222	3.48084	4.64828	8.0002	2.90293	1.91898	2.98713	6.89299	3.71991	3.47183	3.43637	2.10675
ChoE(18:3)	3.27954	2.85072	3.70344	5.54781	5.64474	4.48839	2.36561	5.45167	8.11938	2.35997	4.27038	3.33939	8.23346	9.73024	2.93639	4.41764	2.12145	3.00869	14.6365	20.8206	8.86199	1.88653	2.41623	2.86957	3.50748	3.51195	3.79554	5.36236	7.98266	2.7238	2.01282	3.70895	3.82314	2.96086	2.34593	2.33971	3.37681	2.67548	4.03117	4.49934	2.92694	2.34215	4.54282	3.86385	4.12954	2.91655	3.31497	3.8054
ChoE(22:6)	2.07077	1.72603	1.51144	1.24631	1.87261	2.16017	0.925557	1.95661	4.09756	2.71293	1.9652	1.53879	6.53074	2.86183	1.26119	4.41764	2.12145	1.13427	7.98358	5.94873	2.1027	0.833556	1.40118	2.31494	0.555341	1.48811	2.47007	2.16981	5.73754	2.92576	1.01013	1.39459	4.48522	2.99141	2.55438	0.435829	1.31476	1.78114	2.24642	2.83712	1.43651	1.40096	2.2397	5.32497	2.37088	1.75211	1.59759	1.42315
TAG(44:0)	1.02679	3.30732	1.90551	2.35414	11.1537	1.47564	1.05192	4.99143	5.66644	0.573429	1.58537	0.617185	8.23346	12.0197	1.73094	4.8594	0.663145	2.17052	29.2731	89.2309	18.388	3.23538	2.83466	1.36173	3.35213	1.53301	1.81713	4.1734	7.23429	1.36191	2.34217	1.15298	2.51448	0.821172	2.88832	2.19634	2.70549	0.931999	2.01373	2.00962	1.13662	0.856015	0.998309	1.80635	6.56757	1.51044	2.70837	0.727837
TAG(44:1)	1.13301	5.08238	2.90131	2.91816	14.7698	1.07835	1.30592	6.97027	6.09931	0.599494	1.82235	0.617185	8.01832	17.171	2.61693	6.50695	0.687706	3.32279	54.7205	146.619	31.8799	4.37254	4.49601	2.17876	6.21643	2.56857	1.42774	6.91625	7.98266	1.82389	3.98088	1.18689	4.48522	1.41574	4.16408	4.32653	3.30221	0.899862	2.15334	1.53677	1.50572	0.982832	1.50599	1.2795	10.4623	1.57086	4.12495	0.865698
TAG(46:0)	3.05821	8.98301	3.75417	5.98046	18.1741	2.9136	2.47831	9.66975	14.4119	1.36469	3.2508	1.56878	13.6116	22.3694	5.39756	8.31135	1.38627	6.67973	62.8727	128.394	20.9142	7.56271	5.91956	3.70388	8.79587	3.53572	2.80142	10.3883	9.7494	3.26233	6.6851	2.82306	6.18508	2.16653	5.81176	6.69262	5.0923	2.54153	3.55641	5.1029	2.80683	2.80446	2.59712	3.71009	12.6698	2.66973	4.86816	1.53926
TAG(46:1)	4.66281	15.6935	9.97836	10.9833	43.2391	3.8409	4.08384	23.0691	21.3407	2.11557	6.63802	2.59973	29.9909	46.4564	9.40459	18.2967	2.09583	11.4275	102.454	290.988	68.3236	12.6438	9.26423	7.73617	16.7268	6.76839	5.60543	17.8407	23.6255	5.02077	13.3384	4.21353	12.7892	4.2705	10.7882	14.5509	9.07567	3.24455	7.57487	7.15506	4.23482	4.54781	5.74114	6.34409	23.9033	4.27446	11.8686	2.80193
TAG(46:2)	2.57874	8.81555	6.88808	6.12472	21.2085	2.21812	2.21525	11.1811	10.1436	1.47116	3.78462	1.38871	15.7824	26.4608	5.39758	9.2136	1.68724	5.92829	62.8728	173.954	40.5843	8.41926	6.56381	6.09365	9.09737	3.89532	3.46413	9.36208	12.8063	2.5218	9.30305	3.1763	7.42341	3.17642	7.14003	8.3546	5.85243	2.04366	3.84124	4.01925	2.49469	2.77144	3.21457	3.55638	13.5683	3.2867	6.37295	1.75133
TAG(48:0)	5.96197	17.0989	7.09945	9.04459	25.3406	3.02948	3.69883	13.3511	26.4875	3.48792	5.54579	3.33931	20.8294	25.8761	9.22881	15.4798	2.32606	12.9945	50.6438	134.468	19.1063	9.93469	12.5554	7.15741	16.5618	8.51632	5.40255	15.509	17.9084	5.68728	11.6646	4.90106	6.80415	3.45693	7.69983	15.1981	8.29917	5.55097	4.98414	7.99994	4.10528	8.37805	5.74102	6.1872	17.7018	7.12159	7.19337	4.15953
TAG(48:1)	17.7091	53.4576	27.0079	41.6753	79.782	12.1357	13.5464	48.6634	76.8734	9.06871	21.6473	10.742	91.5895	97.6198	35.7078	50.5587	8.4328	36.7567	228.382	500.84	101.897	41.4565	30.6921	33.181	44.424	21.3495	19.3067	50.5791	64.4913	18.994	35.5652	16.9175	37.4437	15.1199	33.1398	36.5068	35.4088	15.2086	17.8253	32.0515	15.5089	24.6431	20.5381	25.4965	51.5162	19.7744	27.7597	11.2011
TAG(48:2)	13.8948	42.7409	26.5952	33.4765	59.4586	10.7045	10.4655	37.8118	56.1738	8.65046	19.0161	8.57489	66.295	90.1712	27.8142	41.7822	8.12314	24.2384	202.408	468.584	90.2888	35.9442	19.6136	34.9273	29.9959	15.9196	18.5628	38.3258	48.1938	13.7171	28.4937	15.6998	32.5954	14.819	27.9126	36.6861	29.9757	11.7465	14.0796	26.2254	13.2144	18.5462	17.5013	22.5634	40.2576	18.5972	25.6292	10.7636
TAG(48:3)	4.39931	13.1638	12.8283	12.6624	18.174	3.84085	2.93829	12.5554	16.2044	3.294	6.23967	2.75277	19.9516	38.7344	9.43972	11.3383	2.9995	7.73855	69.666	170.915	39.1012	13.639	7.32319	15.0268	10.833	5.88627	5.67297	10.7558	16.3724	4.32416	13.7955	5.85727	11.5205	6.27097	11.6771	13.9037	11.428	3.51492	4.60071	7.87925	3.9018	5.40732	6.99255	7.99171	14.422	7.4427	8.70727	3.70659
TAG(48:4)	6.1156	5.43779	6.058	8.30867	6.5863	6.32797	4.44851	6.97013	8.69633	6.11109	5.79362	6.38533	13.1812	10.875	4.76484	10.4179	4.85763	5.55249	46.5708	360.083	11.0521	4.68412	4.3785	7.80847	5.08017	5.40742	8.47743	5.36222	13.5704	6.1688	3.16788	5.41596	8.10437	5.80038	5.72335	5.06255	6.1567	5.06305	6.24354	9.2253	3.92631	5.33857	5.91984	8.07171	5.5571	6.86474	6.28859	4.96771
TAG(50:0)	3.09501	7.26624	3.29947	4.75633	8.0231	1.07835	1.82145	5.84593	8.84045	1.63082	2.72697	1.32867	6.53074	5.1513	5.26359	4.5649	1.28592	7.73848	11.9754	23.7949	5.18242	7.00253	13.2195	3.91237	10.9455	4.9789	2.47006	5.64465	3.49242	2.35342	7.01234	2.26024	2.45495	1.59538	3.31344	12.3828	3.37673	3.01014	2.06022	2.60069	2.49462	2.90347	2.59705	1.88162	10.2213	2.36124	2.66858	2.7535
TAG(50:1)	49.2727	112.502	51.8413	92.0615	139.188	27.2221	25.284	100.598	181.825	36.2168	57.3115	33.378	167.712	195.205	77.3771	104.995	30.094	77.6265	340.94	605.301	124.612	77.8058	71.835	87.4711	91.8465	67.2642	61.9959	90.4463	161.763	49.1058	68.2851	48.4233	63.2677	33.7545	59.4469	108.151	87.6874	51.3899	45.6588	84.4732	33.5318	91.1114	64.0606	81.7485	98.4153	75.5517	52.2334	36.3701
TAG(50:2)	56.9856	132.288	75.8125	110.538	137.87	44.4706	29.8009	100.271	195.725	41.4086	69.9823	40.0828	183.232	265.722	84.899	125.768	35.6496	72.1492	506.813	884.856	169.21	89.1244	59.1547	142.59	72.5531	55.9293	87.2604	103.362	187.643	53.8155	92.1333	63.4007	91.6698	46.2918	83.8293	112.54	116.23	51.7246	50.2794	132.679	39.9276	91.0398	68.5204	100.395	70.5059	84.8535	60.7703	44.3822
TAG(50:3)	31.7449	76.4996	52.2143	63.9919	61.5751	23.6556	15.3475	57.5698	103.846	26.2505	41.7254	20.5505	98.8842	167.652	49.1191	51.9334	20.7077	35.0383	286.036	452.448	91.9367	61.9569	36.5672	100.908	35.7573	29.2369	48.4091	51.1105	85.3636	29.0836	53.9123	37.3502	59.9722	34.3696	55.5036	45.6966	77.9444	29.1472	23.9035	62.3142	24.4072	45.7949	44.2556	58.2659	46.3559	54.2733	34.1587	26.0051
TAG(50:4)	8.05774	20.7497	18.7584	23.8522	21.1344	6.62952	3.86088	15.9554	23.332	7.63468	9.16851	5.61046	26.8472	50.0325	16.0072	11.7983	4.60419	12.5358	69.6653	170.913	34.8922	25.0449	13.5028	28.9897	13.157	8.65732	9.66081	15.7421	28.0784	7.42799	14.7954	11.1378	19.7325	11.9605	17.5916	22.0321	21.5622	6.65078	5.71064	10.3334	5.68465	10.4493	13.3631	16.3521	13.8379	17.5584	9.55318	6.55792
TAG(52:1)	16.9825	38.1693	19.1336	38.2566	35.6783	6.50877	7.84406	31.1636	39.2811	7.99316	20.7503	10.7797	33.1878	31.1356	27.4949	27.6038	9.22905	34.4108	53.3609	77.3335	24.0465	35.1088	63.5646	24.3618	46.9577	26.7325	16.9262	26.6965	26.4872	16.5766	22.3321	14.9605	14.3911	12.6375	13.502	59.7492	22.6505	15.6208	11.729	13.3056	10.9219	20.6483	21.2862	17.6459	39.7162	22.2377	11.7795	18.4992
TAG(52:2)	129.7	319.117	193.875	295.754	235.195	99.1553	64.0187	261.736	396.925	113.574	181.493	126.15	492.817	665.27	205.219	305.379	126.835	194.9	900.374	1167.24	295.431	222.114	220.118	347.066	199.553	169.918	284.022	213.07	466.387	152.354	188.475	170.697	193.961	147.002	176.047	324.944	294.956	142.643	116.842	278.95	106.987	231.21	191.85	353.259	177.088	277.259	126.118	137.899
TAG(52:3)	113.472	207.366	186.728	262.29	181.398	113.064	45.3566	201.053	342.073	118.459	175.664	109.496	372.356	663.089	162.191	192.63	103.335	139.874	887.234	1075.69	228.766	216.843	196.292	315.225	150.233	128.545	252.602	153.081	400.783	133.866	120.781	149.868	176.972	137.027	173.426	215.117	301.161	129.778	114.981	233.082	84.6325	197.031	188.467	288.251	156.982	269.553	117.215	102.403
TAG(52:4)	49.6454	87.6884	88.17	133.692	72.4678	42.1576	20.0411	81.3522	131.556	56.1832	71.6172	37.6929	161.438	321.9	71.7398	66.6636	40.9034	53.8907	319.586	537.109	114.58	102.297	103.448	163.446	60.6145	50.0911	83.9252	64.0688	184.124	47.5042	52.7275	78.6357	79.9325	67.4081	71.3232	101.833	127.61	61.3977	39.2077	81.1587	30.9021	68.9861	111.68	111.53	66.2128	128.996	47.7478	45.7753
TAG(52:5)	13.5315	28.1637	29.5528	50.7797	26.9968	11.8101	6.39313	21.6705	33.7747	18.1522	17.1624	10.0571	41.1817	80.2402	24.7023	17.357	10.5835	21.1086	85.9684	183.059	40.3147	36.5569	28.2108	45.976	18.9946	15.3134	18.7858	20.4829	50.7657	12.5568	16.8442	20.0285	27.3413	21.6006	23.766	33.2362	35.2215	14.4667	8.90832	15.3159	8.31456	17.428	29.2623	31.1773	18.8624	40.4565	13.9995	13.979
TAG(52:5)	7.89532	4.65502	21.1345	12.662	4.36979	7.8962	4.06346	3.11118	23.4848	2.08835	9.38217	5.543	23.7121	39.3177	16.9445	14.2524	9.04006	5.24487	53.361	113.207	5.28974	15.8004	14.7303	19.5529	3.88009	9.50331	12.9093	12.8662	19.7269	8.50204	3.0887	13.0034	14.9921	15.3455	8.35472	17.9734	16.6226	4.23216	4.50568	7.03411	7.36764	4.78827	9.96037	14.8853	2.37075	10.5007	10.3546	8.78002
TAG(54:2)	15.4387	29.3088	20.7593	45.9731	20.1721	8.2638	6.08967	23.3929	24.5569	11.265	22.7237	13.7573	25.7269	29.9665	24.2216	22.0796	11.182	27.1803	31.9343	41.6411	15.6501	27.9494	58.5613	29.339	44.5409	30.2163	22.4308	15.8972	42.2734	15.955	15.7953	16.3522	14.1907	14.1043	14.1103	84.0258	32.9733	15.4971	9.74392	16.6996	10.5163	21.9453	19.3938	17.4732	22.4207	28.8238	10.3545	17.7148
TAG(54:3)	6.11525	10.1132	13.1074	25.7511	8.9837	7.11191	2.53558	10.1482	18.3061	8.85956	10.7716	6.28402	21.926	52.4162	8.56084	11.1844	6.65917	8.42157	50.6435	65.436	12.6156	10.2108	16.3827	24.3618	11.1704	10.1237	15.1407	8.78499	36.5927	5.1606	6.94222	9.31089	9.4289	7.98517	12.1917	17.8296	25.7604	8.63984	5.90422	15.5669	4.62293	9.32275	8.45845	15.7478	6.60716	22.1602	5.95123	6.40143
TAG(54:3)	36.26	61.5793	63.9836	123.793	48.9767	35.4421	14.5162	57.5655	95.6101	36.2074	61.4896	33.4845	106.179	183.396	56.0826	66.2859	35.2918	47.8713	213.941	281.681	60.018	71.9341	121.815	117.561	82.1555	64.0557	95.0827	45.5	178.259	34.6562	42.2638	51.2786	48.2895	37.1105	54.4454	116.925	144.017	42.4494	32.9932	88.7349	26.8589	64.4533	47.028	75.1324	37.1037	119.125	35.0291	35.4632
TAG(54:4)	29.0194	48.7942	61.0711	108.934	37.8645	30.5581	10.7399	44.6072	86.0424	37.9437	52.3239	26.6025	99.4246	223.882	40.049	45.495	28.6397	37.2649	163.907	256.895	51.2361	51.3903	68.8268	109.222	48.081	42.906	68.8584	34.9577	150.501	23.9521	32.5868	39.0247	40.6484	35.1501	54.0974	36.8475	145.509	34.0994	24.7937	63.9819	20.4085	41.9444	41.207	70.9811	26.7361	119.125	27.8815	27.5212
TAG(54:4)	6.67769	5.79402	4.26185	11.4331	7.95428	5.84785	1.17821	6.63476	17.8557	2.54988	7.19382	6.0819	19.951	28.7977	6.20565	16.5742	3.89579	9.68547	38.5873	68.4104	5.28969	4.71504	15.8634	9.47252	12.2199	9.27771	5.19956	9.28946	19.9865	5.33581	6.75522	6.39562	9.17625	3.61266	5.07226	15.0363	7.0695	6.57693	5.71049	10.4563	4.44168	7.90547	8.10086	5.1701	3.09876	5.28117	3.23384	4.8111
TAG(54:5)	16.5284	26.446	39.1201	76.2429	26.2515	18.3154	7.07325	25.4975	47.2168	24.6266	27.6053	13.9835	60.0162	146	24.9427	23.5169	16.3078	24.4252	106.607	201.279	37.3484	34.1206	46.8194	60.5729	29.3792	24.5908	29.4629	22.659	78.501	13.4685	18.8858	24.4981	29.7319	24.4047	32.244	51.317	61.8121	20.296	13.7138	26.36	9.53133	21.7217	28.0234	35.714	17.4322	66.5287	17.0884	15.3587
TAG(54:5)	9.72154	26.1025	14.8399	20.122	19.7281	7.47384	4.69156	18.4872	31.345	9.0687	21.0493	6.01453	29.5333	40.4919	15.2206	11.4912	8.51725	17.8113	58.7952	95.1796	24.0463	16.6113	14.1165	19.3967	17.0154	10.5749	14.4713	15.0422	19.207	9.72429	15.4525	11.1378	11.4533	16.3698	12.1449	21.0398	15.4503	11.0711	5.41989	15.1901	9.21265	10.3766	12.6029	24.8063	12.2692	15.3421	9.59755	13.1768
TAG(54:6)	7.81407	13.5385	21.5722	40.2102	13.0666	8.20229	3.05316	11.1079	18.9069	10.1619	11.6803	5.71135	28.1899	56.5898	12.5068	7.85995	6.91255	11.5804	47.9263	74.3591	20.672	19.9769	22.0025	27.5926	12.7072	9.81352	10.1531	10.9024	27.5476	6.20555	9.02255	12.0032	16.8615	14.4805	14.6596	21.3562	25.7604	8.63984	5.22616	8.73239	4.59705	9.03203	15.3636	16.3517	8.7756	32.7005	7.7719	7.86142
TAG(54:6)	7.89524	17.5205	12.7721	13.4554	12.7706	5.55225	3.59738	11.542	20.8797	10.0282	14.0319	4.05763	21.2677	32.3042	10.973	6.50676	6.2932	15.7513	47.9263	83.2822	15.3082	12.8281	9.01077	16.5091	10.6456	6.54148	9.09785	9.21741	18.9471	6.5389	12.8813	10.2438	8.54461	12.8632	10.8815	4.51023	11.4274	6.8348	3.93599	8.24105	6.22833	5.90675	9.20941	16.0929	8.57482	18.043	7.01492	9.24673
TAG(54:7)	2.25141	4.34438	6.26505	10.7574	4.30381	1.98643	0.763067	2.66004	5.23353	2.54989	3.54157	1.26864	5.68806	16.5986	3.67991	2.94509	1.73756	5.17945	7.98358	32.718	7.11463	6.60708	5.67966	5.95154	3.50727	2.80213	1.62244	2.58077	5.48808	1.55984	4.14778	2.96422	4.00131	4.62008	4.20641	5.56194	4.56998	1.9123	1.36714	1.7732	1.45949	1.91887	4.00875	4.47847	2.22764	8.14877	1.91488	2.2014
TAG(56:3)	1.2753	2.96464	1.80592	4.97036	1.35603	0.964838	0.853306	1.76726	1.83684	1.39124	1.86993	2.14036	2.31736	2.28947	1.88739	0.883528	1.23573	2.48076	3.99179	2.97436	0.946214	2.27293	5.4001	2.5219	3.6004	4.1722	1.62244	2.0342	3.74187	1.03405	2.01269	1.94853	1.28149	1.236	1.8039	9.29596	4.49532	1.78102	0.865857	3.07354	1.09043	2.77128	1.3148	1.95688	1.05098	3.28653	1.47856	1.56237
TAG(56:4)	1.41991	2.32269	2.05482	2.70599	1.6789	1.19186	0.477291	2.20907	3.24979	1.52431	2.8697	0.675964	4.42405	5.1513	1.79345	1.32529	1.21065	1.56024	5.32238	5.94873	2.73351	1.97442	2.45362	2.79997	1.67947	1.67009	1.68733	1.15271	3.24296	2.05472	1.28939	1.6023	1.57274	2.28859	1.55381	2.84996	2.70547	1.58414	0.774714	2.00962	1.13656	1.27143	1.76074	3.17201	1.65529	2.23785	1.08773	2.01183
TAG(56:4)	1.41991	2.69829	2.25394	5.76374	2.13091	1.53239	0.636719	2.53114	3.53238	1.63076	1.86993	1.56871	4.63472	10.3026	1.57427	2.35607	1.03511	2.04709	7.98358	17.8462	3.25918	1.91572	4.18266	4.5379	2.64621	2.54502	2.40378	1.96639	5.48808	1.00173	1.99332	2.12165	1.74749	1.47556	2.7626	6.21922	6.84117	1.94509	1.09371	3.30997	0.882848	2.44103	1.41036	2.18268	1.40491	4.9035	1.4389	1.09792
TAG(56:5)	2.5048	4.88782	4.46495	5.98012	4.17188	2.16014	1.17819	5.18829	8.40736	3.15532	5.44642	1.26863	9.0937	14.8815	3.2237	2.50333	2.35155	3.63929	11.9754	17.8462	5.61168	4.68379	4.45654	4.88761	3.32084	2.87219	3.86154	2.58076	8.48158	2.99288	3.2076	3.03483	3.76335	5.43024	4.42139	4.98343	5.16728	3.17743	2.33936	4.25788	1.92752	2.30893	3.01943	8.79128	2.58783	4.58883	2.19251	2.97096
TAG(56:6)	1.88987	3.64955	3.10023	3.05947	2.78734	1.47564	0.708915	2.9178	5.52206	2.85061	3.49295	0.999252	7.37342	8.01314	2.48897	1.6198	1.66205	2.91537	11.9754	11.8975	3.36432	3.08243	2.37845	4.12081	2.40264	1.67009	2.20651	1.55955	4.24079	1.82378	2.26451	2.15628	2.33597	3.64379	2.84597	3.33989	3.15293	2.01072	1.04814	1.89141	1.5056	1.43328	2.69446	5.09319	1.86991	3.10147	1.71654	2.1066
TAG(56:6)	8.99095	20.2859	16.5724	22.9791	16.4713	8.14062	3.7797	17.9807	32.3164	13.9971	20.5709	5.6102	30.2171	45.8573	14.2767	12.7182	9.51254	15.2112	57.4363	71.3848	20.5512	17.8278	16.9021	21.5819	14.1691	12.4906	15.587	9.07315	24.9235	11.4793	13.7384	12.5251	15.8599	23.3934	16.8586	22.2638	18.4642	13.3539	6.78357	12.057	8.69118	9.32273	12.0828	35.5209	10.2212	17.0734	8.97407	12.5672
TAG(56:7)	10.0056	34.7621	10.313	26.9055	30.1437	4.78364	3.90128	18.5595	44.3015	14.2545	23.5011	5.47545	59.7745	50.6271	12.7821	16.1046	6.23685	25.8266	76.4563	53.5385	17.474	19.5309	13.9277	24.5364	11.6577	9.47512	5.60511	11.6375	23.6242	19.1308	14.1383	8.61118	19.6657	30.4355	12.3789	15.1657	13.1895	10.2607	7.27774	16.8276	4.02733	14.2715	13.2431	28.4746	12.3103	15.4806	13.516	7.28784
TAG(56:8)	5.99999	19.3584	7.52201	15.9155	15.0649	3.66681	2.3842	10.2165	23.7905	12.1341	14.1388	3.02819	30.4456	24.7067	8.38504	5.90532	4.16207	15.2876	38.5873	59.4873	9.73749	11.243	7.78696	20.7234	6.3835	5.60889	3.0664	6.06827	10.004	11.4379	9.91622	5.63623	11.9873	20.7271	9.75836	9.76665	6.99336	6.54002	3.36631	6.91326	2.56658	9.32273	9.81729	16.0064	7.81179	10.1073	7.05934	5.67141
TAG(56:9)	1.41991	4.03376	2.00504	3.62504	3.64445	0.851328	0.690866	1.76726	3.81497	3.01682	2.67928	0.852303	6.32007	8.01314	2.39314	1.03078	1.06019	5.11474	10.6448	11.8975	3.36432	2.9017	1.9274	4.88763	1.88838	1.26348	0.843666	1.49174	1.49675	2.18671	2.38074	1.35993	2.7523	5.26218	2.17905	2.00506	1.75302	1.35445	0.546857	1.30034	0.952044	1.49803	1.88816	2.94148	1.47645	1.75211	1.8752	1.56238
TAG(58:7)	1.0622	2.96461	2.15437	3.55431	4.56807	0.737818	0.565679	2.72445	4.38015	2.06112	2.48882	0.940472	4.21338	8.5855	1.73082	2.06157	0.959881	2.97743	9.31417	8.92309	3.25918	2.03338	2.45359	3.21705	2.21994	1.42062	1.75223	1.62736	3.24296	1.42785	1.44126	1.53304	1.86399	2.07472	2.22071	2.43551	2.48344	1.48569	0.911428	1.53677	0.928975	1.14194	1.3785	2.78778	1.26183	2.36121	1.71653	1.1908
TAG(58:8)	2.72606	7.30773	3.19975	9.1176	6.04787	1.75941	1.06989	4.01329	9.8499	5.7224	7.14305	1.77874	13.1804	17.7434	3.15979	3.2396	1.96777	7.39669	25.2813	14.8718	3.15405	3.26569	3.56301	8.67634	3.50718	3.41616	1.49264	2.78845	7.48375	5.44077	3.08855	2.19088	4.90955	8.48935	4.5949	3.63832	3.8241	3.07698	1.73448	5.58553	1.39026	3.87165	2.62944	7.12766	2.55131	4.71465	3.03144	2.15397
TAG(58:9)	2.32366	5.47698	3.05042	5.76369	5.37524	1.19186	1.14208	3.43332	7.25319	5.30412	5.34727	1.38866	9.30876	11.4473	2.64867	1.17804	1.7631	6.47436	17.2977	11.8975	3.15405	2.75197	2.60432	7.59096	3.13443	2.21979	0.713871	2.71922	3.74187	4.08348	2.7921	1.9139	3.34701	8.08595	3.86612	3.04496	2.55648	2.44092	1.04814	2.48248	1.06736	3.03546	2.85692	5.55965	2.33489	3.96506	2.31148	2.20136
